# Supplementary material
Source: PubMed Central journal article supplement (PMC3787701)
Supplement: NIHMS481385-supplement-Supplementary_materials.pdf [file NIHMS481385-supplement-Supplementary_materials.pdf]

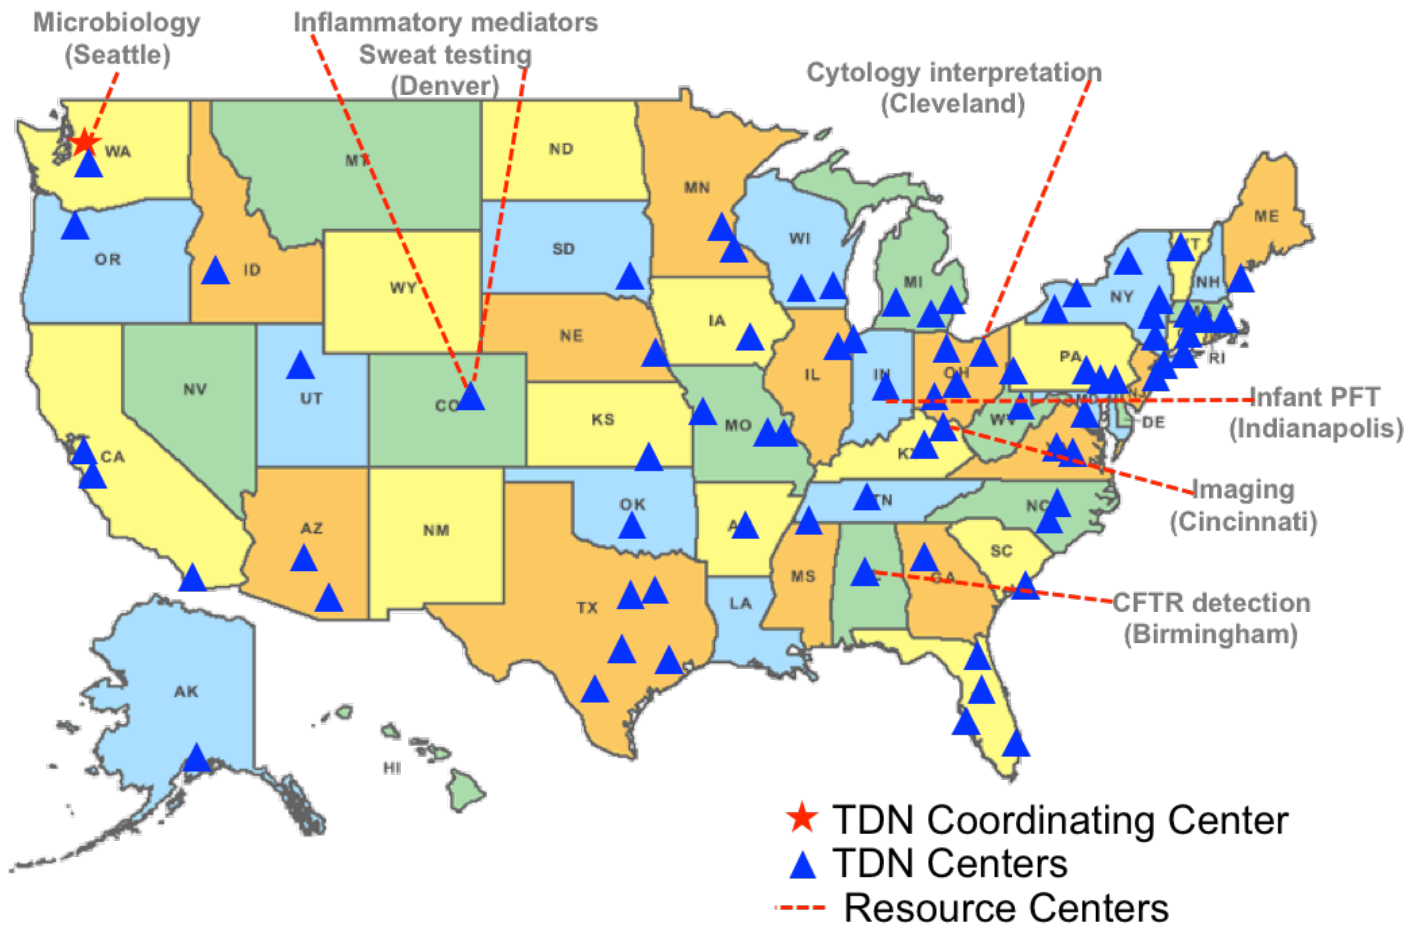

**Supplemental Figure 1.** U.S. map with all the Therapeutics Development Network Centers and Resource centers.

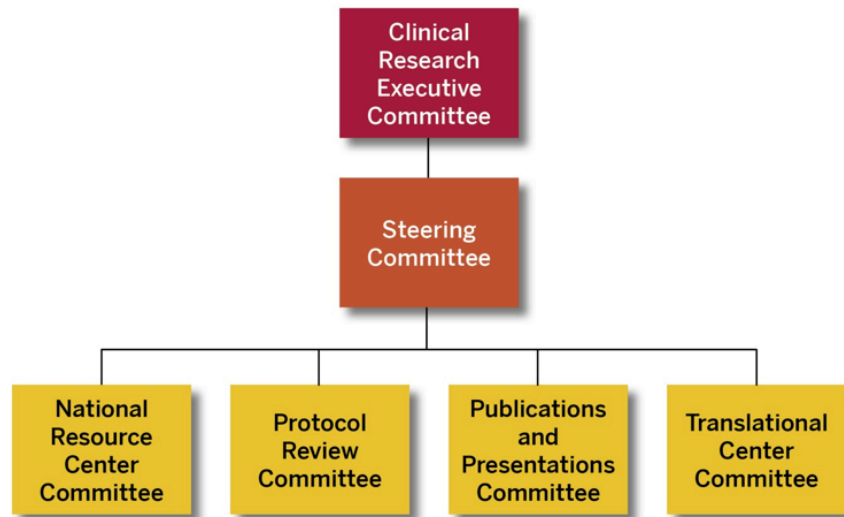

**Supplemental Figure 2.** Organizational (Committee) Structure of the TDN.
